# Supplementary material
Source: Springer Nature journal article supplement (https://www.springermedizin.de/resource/supplementary/12889_2013_6294_MOESM1_ESM.pdf/9498618)
Supplement: MOESM1 [file 9498618]

**Table S1. Theoretical methods and applications used in the intervention**

| Determinant                | Theoretical method                                                                                       | Parameter for use                                                                                                                                                                                           | Practical application                                                                                                                                                                                                               |
|----------------------------|----------------------------------------------------------------------------------------------------------|-------------------------------------------------------------------------------------------------------------------------------------------------------------------------------------------------------------|-------------------------------------------------------------------------------------------------------------------------------------------------------------------------------------------------------------------------------------|
| <u>Phase I: Pre-action</u> |                                                                                                          |                                                                                                                                                                                                             |                                                                                                                                                                                                                                     |
| <i>Knowledge</i>           | Provide general information about behavior (IMB) [1]                                                     |                                                                                                                                                                                                             | Providing facts and correct misperceptions about the target behaviors intake of fruit, vegetables, high-energy snacks and fat (e.g. 'what is the recommendation for fruit consumption?' / 'vegetables contain a lot of pesticides') |
|                            | Provide information on consequences of not complying with guideline of behavior (TRA, TPB, SCT, IMB) [1] |                                                                                                                                                                                                             | Providing information about the possible health consequences of not complying to the dietary guidelines of each target behavior                                                                                                     |
| <i>Awareness</i>           | Monitoring behavior                                                                                      |                                                                                                                                                                                                             | Filling out assessment questionnaires regarding the target behavior                                                                                                                                                                 |
|                            | Information about personal risk (PAPM) [2]                                                               | Messages presented as individual, undeniable, on same dimension, congruent with actual risk, and cumulative rather than for one occasion; messages presented with qualitative and quantitative examples [2] | Providing tailored behavioral, normative and comparative feedback on intake of target behavior                                                                                                                                      |
| <i>Attitude</i>            | Belief selection (TPB) [2]                                                                               | Requires investigation of the current beliefs of individual before choosing belief on which to intervene [2]                                                                                                | Selecting advantages and disadvantages regarding target behavior from a predefined list                                                                                                                                             |

|                      |                                                  |                                                                                                                                                                                                     |                                                                                                                                                                                                                                                                                                                                                                               |
|----------------------|--------------------------------------------------|-----------------------------------------------------------------------------------------------------------------------------------------------------------------------------------------------------|-------------------------------------------------------------------------------------------------------------------------------------------------------------------------------------------------------------------------------------------------------------------------------------------------------------------------------------------------------------------------------|
|                      | Persuasive communication (PCM, ELM, SCT) [2] [3] | Consideration of the source, message, channel and receiver [2], having knowledge of the assumptions in the target group, message should not deviate too much from initial ideas of target group [3] | Using persuasive communication in feedback on selected advantages and disadvantages to strengthen advantages and weaken disadvantages / correct misperceptions regarding the target behavior<br><br>Providing a 'taste-test' in which participants can state their preference regarding the taste of fruits and vegetables, followed by a list of products fitting preference |
|                      | Modeling (SCT) [2]                               | Target group can identify with the model, a coping model is provided, reinforcement of the model is visible [2, 4]                                                                                  | Peer stories, incorporated in feedback on disadvantages regarding target behavior                                                                                                                                                                                                                                                                                             |
| <i>Self-efficacy</i> | Prompting identification of barriers (SCT) [1]   | Choosing barriers which are important to individuals                                                                                                                                                | Selecting barriers regarding the target behavior from a predefined list<br><br>Selecting difficult situations regarding the target behavior from a predefined list                                                                                                                                                                                                            |
|                      | Persuasive communication (PCM, ELM, SCT) [2, 3]  |                                                                                                                                                                                                     | Using persuasive communication in feedback on how to overcome selected barriers / difficult situations regarding the target behavior                                                                                                                                                                                                                                          |
|                      | Provide instructions (SCT) [1]                   |                                                                                                                                                                                                     | Providing information and tips on how to be able to perform the target behavior,                                                                                                                                                                                                                                                                                              |

|                                                                       |                                                                                                                            |                                                                                                                    |                                                                                                                                                                                                                                                         |
|-----------------------------------------------------------------------|----------------------------------------------------------------------------------------------------------------------------|--------------------------------------------------------------------------------------------------------------------|---------------------------------------------------------------------------------------------------------------------------------------------------------------------------------------------------------------------------------------------------------|
|                                                                       |                                                                                                                            |                                                                                                                    | incorporated in feedback on selected barriers / difficult situations                                                                                                                                                                                    |
|                                                                       | Modeling (SCT) [1-3]                                                                                                       | Target group can identify with the model, a coping model is provided, reinforcement of the model is visible [2, 4] | Peer stories regarding the target behavior, incorporated in feedback on selected barriers / difficult situations                                                                                                                                        |
|                                                                       | Prompt specific goal setting (CT) [1, 5]<br><br>Action planning (implementation intentions) [2, 6, 7]                      | Goals should be specific and challenging, but feasible [5]<br><br>Existing positive intention [2]                  | Setting goals regarding the target behavior in an open-ended format<br><br>Formulating action plans regarding the target behavior in an open-ended format                                                                                               |
| <i>Intention</i>                                                      | Prompt intention formation (TRA, TPB, SCT, IMB) [1]                                                                        |                                                                                                                    | Stimulate participants to change target behavior when they are not complying with the recommendation (see 'awareness')<br><br>Changing negative attitude regarding target behavior to stimulate participants to change target behavior (see 'attitude') |
| <i>Availability and location of food products in home environment</i> | Monitoring the arrangement of food products in the home environment<br><br>Persuasive communication (PCM, ELM, SCT) [2, 3] |                                                                                                                    | Filling out a short assessment questionnaire about the arrangement of food products in the home environment regarding the target behavior<br><br>Using persuasive communication in feedback on availability and location of                             |

|                                                                               |                                                                                        |  |                                                                                                                                                                                                                                                                                                                                   |
|-------------------------------------------------------------------------------|----------------------------------------------------------------------------------------|--|-----------------------------------------------------------------------------------------------------------------------------------------------------------------------------------------------------------------------------------------------------------------------------------------------------------------------------------|
|                                                                               | <p>Provide instructions (SCT) [1]</p> <p>Create a more supportive home environment</p> |  | <p>food products in home environment regarding the target behavior</p> <p>Providing suggestions to rearrange home environment into a more supportive environment regarding the target behavior</p> <p>Stimulating participants to rearrange home environment regarding the target behavior based on the provided instructions</p> |
| <i>Perceived availability and price of products in local food environment</i> | Tailored objective information                                                         |  | <p>Providing information about objective availability and price of healthy food products regarding the target behavior in the supermarket the participant tends to go to</p>                                                                                                                                                      |
| <u>Phase II: Action</u>                                                       |                                                                                        |  |                                                                                                                                                                                                                                                                                                                                   |
| <i>Awareness of progression of behavior change</i>                            | Monitoring progression of behavior change                                              |  | <p>Stimulating participants to keep daily record of progress regarding (the change in) the target behavior</p>                                                                                                                                                                                                                    |
| <i>Self-efficacy</i>                                                          | Prompting identification of barriers (SCT) [1]                                         |  | <p>Keeping track of situations which caused failure to change target behavior</p>                                                                                                                                                                                                                                                 |
| <u>Phase III: evaluation</u>                                                  |                                                                                        |  |                                                                                                                                                                                                                                                                                                                                   |
| <i>Awareness of progression of behavior change</i>                            | Monitoring progression of behavior change                                              |  | <p>Filling out an assessment questionnaire about reaching goal (and intake) regarding</p>                                                                                                                                                                                                                                         |

|                      |                                                |                                                                       |                                                                                                                                                                                                  |
|----------------------|------------------------------------------------|-----------------------------------------------------------------------|--------------------------------------------------------------------------------------------------------------------------------------------------------------------------------------------------|
|                      |                                                |                                                                       | the target behavior                                                                                                                                                                              |
|                      | Provide feedback on performance (CT) [1, 8, 9] |                                                                       | Providing tailored feedback on progress of behavior change regarding the target behavior (e.g. whether someone did or did not eat more fruit)                                                    |
|                      | Prompt self-monitoring of behavior (CT) [1]    |                                                                       | Stimulating participants to keep record of their target behavior and to act on it when diverging from goal                                                                                       |
|                      | Prompt review of behavioral goals (CT) [1]     |                                                                       | Stimulating participants to review achievement of goal and, if applicable, adapt goal                                                                                                            |
| <i>Attitude</i>      | Decisional balance                             |                                                                       | Participants specify which advantages / disadvantages they perceive for changing the target behavior<br><br>Participants review their decisional balance                                         |
| <i>Self-efficacy</i> | Coping planning [7]                            | Identification of high risk situations and practicing coping response | Identifying situations which caused failure to change target behavior and making plans to avoid or manage these situations the next time (i.e. formulating coping plans in an open-ended format) |
|                      | Goal setting (CT) [1, 5]                       | Goals should be specific and challenging, but feasible [5]            | Participants can adapt their goal regarding the same target behavior (i.e. lower or increase the goal)<br><br>Participants can set a goal                                                        |

|  |                                   |  |                                                                                                              |
|--|-----------------------------------|--|--------------------------------------------------------------------------------------------------------------|
|  |                                   |  | for another target behavior<br>(i.e. participants are<br>redirected to another target<br>behavior)           |
|  | Provide instructions (SCT)<br>[1] |  | Providing information and<br>tips on how participants can<br>maintain their new behavior<br>on the long-term |

**IMB** = Information-Motivation-Behavioral Skills Model, **TRA** = Theory of Reasoned Action,  
**TPB** = Theory of Planned Behavior, **SCT** = Social Cognitive Theory, **PAPM** = Precaution  
Adoption Process Model, **PCM** = Persuasion Communication Matrix, **ELM** = Elaboration  
Likelihood Model, **CT** = Control Theory

## References

1. Abraham C, Michie S: **A taxonomy of behavior change techniques used in interventions.** *Health Psychol* 2008, **27**:379-387.
2. Bartholomew LK, Parcel GS, Kok G, Gottlieb NH, Fernández ME: *Planning Health Promotion Programs: An Intervention Mapping Approach.* San Francisco: Jossey-Bass; 2011.
3. Kok G, Lechner L, Meertens R, Brug J: **Theorieën en methodieken van verandering (Theories and methodologies of change).** In *Gezondheidsvoorlichting en Gedragsverandering: Een Planmatige Aanpak (Health Education and Behavioral Change: A Systematic Approach).* Volume 8. Edited by Brug J, van Assema P, Lechner L. Assen: Van Gorcum; 2012
4. Kok G, van Empelen P: **Interventie ontwikkeling (Intervention development).** In *Gezondheidsvoorlichting en Gedragsverandering: Een Planmatige Aanpak (Health Education and Behavioral Change: A Systematic Approach).* Edited by Brug J, van Assema P, Lechner L. Assen: Van Gorcum; 2012: 125-144
5. Strecher VJ, Seijts GH, Kok GJ, Latham GP, Glasgow R, DeVellis B, Meertens RM, Bulger DW: **Goal setting as a strategy for health behavior change** *Health Educ Behav* 1995, **22**:190-200.
6. Gollwitzer PM, Sheeran P: **Implementation intentions and goal achievement: a meta-analysis of effects and processes.** *Advances in Experimental Social Psychology* 2006, **38**:69-119.
7. Sniehotta FF, Schwarzer R, Scholz U, Schüz B: **Action planning and coping planning for long-term lifestyle change: theory and assessment.** *Eur J Soc Psychol* 2005, **35**:565-576.
8. Mento AJ, Steel RP, Karren RJ: **A meta-analytic study of the effects of goal setting on task performance: 1966–1984.** *Organ behav hum decis process* 1987, **39**:52-83.

9. Neubert MJ: **The value of feedback and goal setting over goal setting alone and potential moderators of this effect: a meta-analysis.** *Human Performance* 1998, **11:321-335.**
